# Supplementary material for: Atmospheric inertia-gravity waves retrieved from level-2 data of the satellite microwave limb sounder Aura/MLS
Source: Copernicus journal article supplement (doi:10.5194/angeo-34-781-2016), 2016-09-19
Supplement: Supplementary file 1 [file angeo-34-781-2016-supplement.zip]

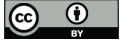

## *Supplement of*

# **Atmospheric inertia-gravity waves retrieved from level-2 data of the satellite microwave limb sounder Aura/MLS**

**Klemens Hocke et al.**

*Correspondence to:* Klemens Hocke ([klemens.hocke@iap.unibe.ch](mailto:klemens.hocke@iap.unibe.ch))

- [angeo-34-781-2016-supplement-title-page.pdf](#)
- [supplement1.jpg](#)
- [supplement2.jpg](#)
- [supplement3.jpg](#)

The copyright of individual parts of the supplement might differ from the CC-BY 3.0 licence.
